# Supplementary material for: Learning Analytics to Assess Beliefs about Science: Evolution of Expertise as Seen through Biological Inquiry
Source: Atypon-hosted journal article supplement (doi:10.1187/cbe.19-11-0247), 2020-09-01
Supplement: combinedsupmats.pdf [file combinedsupmats.pdf]

# Supplemental Material

*CBE—Life Sciences Education*

Peffer *et al.*

Supplemental Table 1. Nature of science items included in this study

| <i>Item</i>                                                                                                                                                                                                                                                                                                                                                                                                                                                                                                                                                                                                                                                                    | <i>Source</i>              |
|--------------------------------------------------------------------------------------------------------------------------------------------------------------------------------------------------------------------------------------------------------------------------------------------------------------------------------------------------------------------------------------------------------------------------------------------------------------------------------------------------------------------------------------------------------------------------------------------------------------------------------------------------------------------------------|----------------------------|
| <i>It is believed that about 65 million years ago the dinosaurs became extinct. Of the hypotheses formulated by scientists to explain the extinction, two enjoy wide support. The first, formulated by one group of scientists, suggests that a huge meteorite hit the earth 65 million years ago and led to a series of events that caused the extinction. The second hypothesis, formulated by another group of scientists, suggests that massive and violent volcanic eruptions were responsible for the extinction. How are these different conclusions possible if scientists in both groups have access to and use the same set of data to derive their conclusions?</i> | VNOS; Lederman et al. 2002 |
| <i>After scientists have developed a scientific theory (e. g., atomic theory, evolution theory), does the theory ever change? Explain why and defend your answer with examples.</i>                                                                                                                                                                                                                                                                                                                                                                                                                                                                                            | VNOS; Lederman et al. 2002 |
| <i>Do you think that scientific investigations can follow more than one method? Explain why and defend your answer with examples.</i>                                                                                                                                                                                                                                                                                                                                                                                                                                                                                                                                          | VASI; Lederman et al. 2014 |

**Supplemental Table 2.** Analysis of maximum likelihood parameter estimates of Poisson regression model for total number of actions. **Bold font indicates statistical significance.**

| Analysis Of Maximum Likelihood Parameter Estimates |          |                |                |                            |                 |                  |       |
|----------------------------------------------------|----------|----------------|----------------|----------------------------|-----------------|------------------|-------|
| Parameter                                          | DF       | Estimate       | Standard Error | Wald 95% Confidence Limits | Wald Chi-Square | Pr >             | ChiSq |
| Intercept                                          | 1        | 4.2269         | 0.3860         | 3.4703 4.9835              | 119.91          | <.0001           |       |
| <b>Non-science Major</b>                           | <b>1</b> | <b>-0.4492</b> | <b>0.1647</b>  | <b>-0.7721 -0.1263</b>     | <b>7.43</b>     | <b>0.0064</b>    |       |
| <b>Biology Major</b>                               | 1        | -0.2030        | 0.1560         | -0.5087 0.1027             | 1.69            | 0.1931           |       |
| <b>Biology Graduate</b>                            | 0        | 0.0000         | 0.0000         | 0.0000 0.0000              | .               | .                |       |
| Intrinsic Goal Regulation                          | 1        | 0.0161         | 0.0544         | -0.0904 0.1227             | 0.09            | 0.7667           |       |
| Extrinsic Goal Regulation                          | 1        | -0.0810        | 0.0445         | -0.1682 0.0062             | 3.31            | 0.0687           |       |
| Task Value                                         | 1        | -0.0228        | 0.0628         | -0.1459 0.1002             | 0.13            | 0.7162           |       |
| Control Beliefs                                    | 1        | -0.0605        | 0.0543         | -0.1669 0.0460             | 1.24            | 0.2655           |       |
| Self-Efficacy                                      | 1        | 0.0147         | 0.0627         | -0.1082 0.1377             | 0.06            | 0.8145           |       |
| Test Anxiety                                       | 1        | -0.0072        | 0.0335         | -0.0729 0.0584             | 0.05            | 0.8295           |       |
| Rehearsal                                          | 1        | -0.0121        | 0.0452         | -0.1006 0.0765             | 0.07            | 0.7895           |       |
| Elaboration                                        | 1        | -0.0462        | 0.0581         | -0.1600 0.0676             | 0.63            | 0.4262           |       |
| Organization                                       | 1        | -0.0382        | 0.0476         | -0.1315 0.0551             | 0.64            | 0.4227           |       |
| <b>Critical Thinking</b>                           | <b>1</b> | <b>-0.1222</b> | <b>0.0421</b>  | <b>-0.2048 -0.0397</b>     | <b>8.42</b>     | <b>0.0037</b>    |       |
| <b>Metacognition</b>                               | <b>1</b> | <b>0.1744</b>  | <b>0.0697</b>  | <b>0.0378 0.3110</b>       | <b>6.26</b>     | <b>0.0124</b>    |       |
| <b>Time and Study Environment</b>                  | <b>1</b> | <b>-0.3035</b> | <b>0.0567</b>  | <b>-0.4147 -0.1924</b>     | <b>28.65</b>    | <b>&lt;.0001</b> |       |
| <b>Effort Regulation</b>                           | <b>1</b> | <b>0.1492</b>  | <b>0.0650</b>  | <b>0.0219 0.2766</b>       | <b>5.27</b>     | <b>0.0216</b>    |       |
| Peer Learning                                      | 1        | -0.0674        | 0.0369         | -0.1398 0.0050             | 3.33            | 0.0680           |       |
| Help Seeking                                       | 1        | -0.0119        | 0.0412         | -0.0926 0.0688             | 0.08            | 0.7725           |       |
| Science Identity                                   | 1        | 0.1865         | 0.0740         | 0.0414 0.3316              | 6.34            | 0.0118           |       |
| NOS1_Sophisticated                                 | 1        | 0.2899         | 0.2507         | -0.2014 0.7812             | 1.34            | 0.2474           |       |
| NOS1_Mixed                                         | 1        | 0.0874         | 0.0977         | -0.1040 0.2788             | 0.80            | 0.3709           |       |
| NOS1_Naive                                         | 0        | 0.0000         | 0.0000         | 0.0000 0.0000              | .               | .                |       |

| Analysis Of Maximum Likelihood Parameter Estimates |          |                |                |                            |                |                 |               |
|----------------------------------------------------|----------|----------------|----------------|----------------------------|----------------|-----------------|---------------|
| Parameter                                          | DF       | Estimate       | Standard Error | Wald 95% Confidence Limits |                | Wald Chi-Square | Pr > ChiSq    |
| <b>NOS2_Sophisticated</b>                          | <b>1</b> | <b>0.4031</b>  | <b>0.1197</b>  | <b>0.1685</b>              | <b>0.6377</b>  | <b>11.34</b>    | <b>0.0008</b> |
| NOS2_Mixed                                         | 1        | 0.0546         | 0.1052         | -0.1516                    | 0.2607         | 0.27            | 0.6038        |
| NOS2_Naive                                         | 0        | 0.0000         | 0.0000         | 0.0000                     | 0.0000         | .               | .             |
| <b>Race_White/European American</b>                | <b>1</b> | <b>-0.2386</b> | <b>0.1072</b>  | <b>-0.4487</b>             | <b>-0.0286</b> | <b>4.96</b>     | <b>0.0260</b> |
| Race_Hispanic/Latin American                       | 1        | -0.1944        | 0.1409         | -0.4706                    | 0.0818         | 1.90            | 0.1678        |
| Race_Other                                         | 0        | 0.0000         | 0.0000         | 0.0000                     | 0.0000         | .               | .             |
| <b>Gender_Male</b>                                 | <b>1</b> | <b>-0.3124</b> | <b>0.1057</b>  | <b>-0.5196</b>             | <b>-0.1052</b> | <b>8.73</b>     | <b>0.0031</b> |
| Gender_Female                                      | 0        | 0.0000         | 0.0000         | 0.0000                     | 0.0000         | .               | .             |
| <b>No hypothesis revision</b>                      | <b>1</b> | <b>-0.2091</b> | <b>0.0960</b>  | <b>-0.3973</b>             | <b>-0.0209</b> | <b>4.74</b>     | <b>0.0294</b> |
| Hypothesis revision                                | 0        | 0.0000         | 0.0000         | 0.0000                     | 0.0000         | .               | .             |
| Scale                                              | 0        | 1.0000         | 0.0000         | 1.0000                     | 1.0000         |                 |               |

**Supplemental Table 3.** Analysis of maximum likelihood parameter estimates of Poisson regression model for number of actions before generation of first hypothesis. **Bold font indicates statistical significance.**

| Analysis Of Maximum Likelihood Parameter Estimates |          |                |                |                            |                |                 |                  |
|----------------------------------------------------|----------|----------------|----------------|----------------------------|----------------|-----------------|------------------|
| Parameter                                          | DF       | Estimate       | Standard Error | Wald 95% Confidence Limits |                | Wald Chi-Square | Pr > ChiSq       |
| Intercept                                          | 1        | 2.6384         | 0.8429         | 0.9862                     | 4.2905         | 9.80            | 0.0017           |
| <b>Non-science Major</b>                           | <b>1</b> | <b>0.8156</b>  | <b>0.3338</b>  | <b>0.1615</b>              | <b>1.4698</b>  | <b>5.97</b>     | <b>0.0145</b>    |
| <b>Biology Major</b>                               | 1        | 0.5574         | 0.3541         | -0.1366                    | 1.2515         | 2.48            | 0.1154           |
| <b>Biology Graduate</b>                            | 0        | 0.0000         | 0.0000         | 0.0000                     | 0.0000         | .               | .                |
| Intrinsic Goal Regulation                          | 1        | -0.1346        | 0.1026         | -0.3356                    | 0.0664         | 1.72            | 0.1894           |
| <b>Extrinsic Goal Regulation</b>                   | <b>1</b> | <b>-0.5776</b> | <b>0.1023</b>  | <b>-0.7780</b>             | <b>-0.3771</b> | <b>31.90</b>    | <b>&lt;.0001</b> |
| Task Value                                         | 1        | -0.0230        | 0.1233         | -0.2647                    | 0.2187         | 0.03            | 0.8521           |
| Control Beliefs                                    | 1        | -0.2070        | 0.1302         | -0.4621                    | 0.0481         | 2.53            | 0.1117           |
| Self-Efficacy                                      | 1        | 0.0743         | 0.1392         | -0.1984                    | 0.3471         | 0.29            | 0.5932           |
| Test Anxiety                                       | 1        | 0.0941         | 0.0735         | -0.0500                    | 0.2381         | 1.64            | 0.2006           |
| Rehearsal                                          | 1        | -0.0706        | 0.0988         | -0.2643                    | 0.1230         | 0.51            | 0.4747           |
| <b>Elaboration</b>                                 | <b>1</b> | <b>0.3326</b>  | <b>0.1202</b>  | <b>0.0970</b>              | <b>0.5681</b>  | <b>7.66</b>     | <b>0.0057</b>    |
| Organization                                       | 1        | 0.0383         | 0.0989         | -0.1556                    | 0.2322         | 0.15            | 0.6986           |
| Critical Thinking                                  | 1        | -0.1775        | 0.0963         | -0.3662                    | 0.0112         | 3.40            | 0.0652           |
| Metacognition                                      | 1        | 0.0142         | 0.1431         | -0.2663                    | 0.2946         | 0.01            | 0.9210           |
| <b>Time Study Environment</b>                      | <b>1</b> | <b>-0.3675</b> | <b>0.1364</b>  | <b>-0.6348</b>             | <b>-0.1002</b> | <b>7.26</b>     | <b>0.0070</b>    |
| Effort Regulation                                  | 1        | 0.1985         | 0.1437         | -0.0831                    | 0.4801         | 1.91            | 0.1672           |
| <b>Peer Learning</b>                               | <b>1</b> | <b>-0.3237</b> | <b>0.0928</b>  | <b>-0.5056</b>             | <b>-0.1418</b> | <b>12.17</b>    | <b>0.0005</b>    |
| Help Seeking                                       | 1        | 0.1189         | 0.0875         | -0.0526                    | 0.2904         | 1.85            | 0.1742           |
| <b>Science Identity</b>                            | <b>1</b> | <b>0.7498</b>  | <b>0.1612</b>  | <b>0.4339</b>              | <b>1.0657</b>  | <b>21.64</b>    | <b>&lt;.0001</b> |
| <b>NOS1_Sophisticated</b>                          | <b>1</b> | <b>1.1630</b>  | <b>0.4610</b>  | <b>0.2595</b>              | <b>2.0666</b>  | <b>6.36</b>     | <b>0.0116</b>    |
| NOS1_Mixed                                         | 1        | 0.4001         | 0.2218         | -0.0345                    | 0.8348         | 3.26            | 0.0712           |

| Analysis Of Maximum Likelihood Parameter Estimates |          |                |                |                            |                |                 |                  |
|----------------------------------------------------|----------|----------------|----------------|----------------------------|----------------|-----------------|------------------|
| Parameter                                          | DF       | Estimate       | Standard Error | Wald 95% Confidence Limits |                | Wald Chi-Square | Pr > ChiSq       |
| NOS1_Naive                                         | 0        | 0.0000         | 0.0000         | 0.0000                     | 0.0000         | .               | .                |
| <b>NOS2_Sophisticated</b>                          | <b>1</b> | <b>1.1398</b>  | <b>0.2863</b>  | <b>0.5786</b>              | <b>1.7010</b>  | <b>15.85</b>    | <b>&lt;.0001</b> |
| <b>NOS2_Mixed</b>                                  | <b>1</b> | <b>0.6384</b>  | <b>0.2715</b>  | <b>0.1062</b>              | <b>1.1706</b>  | <b>5.53</b>     | <b>0.0187</b>    |
| NOS2_Naive                                         | 0        | 0.0000         | 0.0000         | 0.0000                     | 0.0000         | .               | .                |
| <b>Race_White/European American</b>                | <b>1</b> | <b>-1.2317</b> | <b>0.2447</b>  | <b>-1.7113</b>             | <b>-0.7521</b> | <b>25.34</b>    | <b>&lt;.0001</b> |
| Race_Hispanic/Latin American                       | 1        | -0.2484        | 0.2743         | -0.7859                    | 0.2892         | 0.82            | 0.3651           |
| Race_Other                                         | 0        | 0.0000         | 0.0000         | 0.0000                     | 0.0000         | .               | .                |
| <b>Gender_Male</b>                                 | <b>1</b> | <b>-1.4068</b> | <b>0.2755</b>  | <b>-1.9468</b>             | <b>-0.8668</b> | <b>26.07</b>    | <b>&lt;.0001</b> |
| Gender_Female                                      | 0        | 0.0000         | 0.0000         | 0.0000                     | 0.0000         | .               | .                |
| No hypothesis revision                             | 1        | 0.2801         | 0.2465         | -0.2030                    | 0.7632         | 1.29            | 0.2559           |
| Hypothesis revision                                | 0        | 0.0000         | 0.0000         | 0.0000                     | 0.0000         | .               | .                |
| Scale                                              | 0        | 1.0000         | 0.0000         | 1.0000                     | 1.0000         |                 |                  |

**Supplemental Table 4.** Analysis of maximum likelihood estimates for logistic regression of complexity. **Bold font indicates statistical significance.**

| Analysis of Maximum Likelihood Estimates |          |                |                |                 |               |
|------------------------------------------|----------|----------------|----------------|-----------------|---------------|
| Parameter                                | DF       | Estimate       | Standard Error | Wald Chi-Square | Pr > ChiSq    |
| Intercept                                | 1        | -0.8655        | 4.7951         | 0.0326          | 0.8568        |
| <b>Non-science Major</b>                 | 1        | 0.0579         | 1.9901         | 0.0008          | 0.9768        |
| <b>Biology Major</b>                     | 1        | -0.6052        | 1.6086         | 0.1415          | 0.7068        |
| Intrinsic Goal Regulation                | 1        | -0.3172        | 0.7388         | 0.1843          | 0.6677        |
| Extrinsic Goal Regulation                | 1        | 0.3086         | 0.4422         | 0.4870          | 0.4853        |
| Task Value                               | 1        | 0.2176         | 0.7888         | 0.0761          | 0.7826        |
| <b>Control Beliefs</b>                   | <b>1</b> | <b>-1.3490</b> | <b>0.5968</b>  | <b>5.1093</b>   | <b>0.0238</b> |
| <b>Self-Efficacy</b>                     | <b>1</b> | <b>1.4846</b>  | <b>0.6291</b>  | <b>5.5698</b>   | <b>0.0183</b> |
| Test Anxiety                             | 1        | 0.0330         | 0.3502         | 0.0089          | 0.9248        |
| Rehearsal                                | 1        | 0.7751         | 0.5226         | 2.1996          | 0.1380        |
| Elaboration                              | 1        | 0.7516         | 0.6176         | 1.4810          | 0.2236        |
| Organization                             | 1        | 0.2031         | 0.4594         | 0.1953          | 0.6585        |
| Critical Thinking                        | 1        | 0.6191         | 0.4465         | 1.9224          | 0.1656        |
| <b>Metacognition</b>                     | <b>1</b> | <b>-1.7781</b> | <b>0.8773</b>  | <b>4.1078</b>   | <b>0.0427</b> |
| Time <b>and</b> Study Environment        | 1        | 1.2463         | 0.6470         | 3.7104          | 0.0541        |
| <b>Effort Regulation</b>                 | <b>1</b> | <b>-1.5017</b> | <b>0.6216</b>  | <b>5.8355</b>   | <b>0.0157</b> |
| Peer Learning                            | 1        | -0.5352        | 0.3901         | 1.8824          | 0.1701        |
| <b>Help Seeking</b>                      | <b>1</b> | <b>1.2058</b>  | <b>0.5088</b>  | <b>5.6166</b>   | <b>0.0178</b> |
| <b>Science Identity</b>                  | <b>1</b> | <b>-2.3117</b> | <b>0.8507</b>  | <b>7.3850</b>   | <b>0.0066</b> |
| NOS Principle 1_Sophisticated            | 1        | 4.6262         | 2.6294         | 3.0955          | 0.0785        |
| NOS Principle 2_Mixed                    | 1        | 0.4361         | 0.9070         | 0.2312          | 0.6306        |
| NOS Principle                            | 1        | -1.8985        | 1.2954         | 2.1478          | 0.1428        |

| Analysis of Maximum Likelihood Estimates |    |          |                |                 |            |
|------------------------------------------|----|----------|----------------|-----------------|------------|
| Parameter                                | DF | Estimate | Standard Error | Wald Chi-Square | Pr > ChiSq |
| 2_Sophisticated                          |    |          |                |                 |            |
| NOS Principle 2_Mixed                    | 1  | -1.3205  | 1.0153         | 1.6916          | 0.1934     |
| Race_White/European American             | 1  | 0.8927   | 1.0163         | 0.7716          | 0.3797     |
| Race_Hispanic/Latin American             | 1  | 0.8706   | 1.4298         | 0.3708          | 0.5426     |
| Gender                                   | 1  | -1.2470  | 1.1223         | 1.2346          | 0.2665     |
| Hypothesis Revision                      | 1  | 1.3084   | 1.0903         | 1.4401          | 0.2301     |



**Supplemental Table 5.** Analysis of maximum likelihood estimates for logistic regression of complexity with 11 predictors. **Bold font indicates statistical significance.**

| Analysis of Maximum Likelihood Estimates |          |                |                |                 |               |
|------------------------------------------|----------|----------------|----------------|-----------------|---------------|
| Parameter                                | DF       | Estimate       | Standard Error | Wald Chi-Square | Pr > ChiSq    |
| Intercept                                | 1        | 0.4211         | 2.8515         | 0.0218          | 0.8826        |
| <b>Control Beliefs</b>                   | <b>1</b> | <b>-1.2255</b> | <b>0.4878</b>  | <b>6.3117</b>   | <b>0.0120</b> |
| <b>Self-Efficacy</b>                     | <b>1</b> | <b>1.1055</b>  | <b>0.4462</b>  | <b>6.1388</b>   | <b>0.0132</b> |
| <b>Rehearsal</b>                         | <b>1</b> | <b>1.0086</b>  | <b>0.4481</b>  | <b>5.0656</b>   | <b>0.0244</b> |
| Elaboration                              | 1        | 0.6790         | 0.4074         | 2.7771          | 0.0956        |
| <b>Metacognition</b>                     | <b>1</b> | <b>-1.6249</b> | <b>0.7718</b>  | <b>4.4321</b>   | <b>0.0353</b> |
| <b>Time and Study Environment</b>        | <b>1</b> | <b>1.1611</b>  | <b>0.5059</b>  | <b>5.2673</b>   | <b>0.0217</b> |
| <b>Effort Regulation</b>                 | <b>1</b> | <b>-1.1282</b> | <b>0.4568</b>  | <b>6.0998</b>   | <b>0.0135</b> |
| <b>Help Seeking</b>                      | <b>1</b> | <b>0.6449</b>  | <b>0.3231</b>  | <b>3.9834</b>   | <b>0.0460</b> |
| <b>Science Identity</b>                  | <b>1</b> | <b>-2.0102</b> | <b>0.5390</b>  | <b>13.9068</b>  | <b>0.0002</b> |
| <b>NOS Principle 1_Sophisticated</b>     | <b>1</b> | <b>5.4477</b>  | <b>2.3388</b>  | <b>5.4255</b>   | <b>0.0198</b> |
| NOS Principle 1_Mixed                    | 1        | 0.2721         | 0.7313         | 0.1385          | 0.7098        |
| <b>Hypothesis Revision</b>               | <b>1</b> | <b>1.9165</b>  | <b>0.9317</b>  | <b>4.2310</b>   | <b>0.0397</b> |

**Supplementary Table 6.** Analysis of maximum likelihood parameter estimates of multinomial logistic regression model for predicting how likely individuals are to be in one of three activity-based clusters. **Bold font indicates statistical significance.**

| Analysis of Maximum Likelihood Estimates |          |          |                |                |                 |               |
|------------------------------------------|----------|----------|----------------|----------------|-----------------|---------------|
| Parameter                                | Combined | DF       | Estimate       | Standard Error | Wald Chi-Square | Pr > ChiSq    |
| Intercept                                | 1        | 1        | -2.0386        | 4.6512         | 0.1921          | 0.6612        |
| Intercept                                | 2        | 1        | -2.9917        | 4.3480         | 0.4734          | 0.4914        |
| <b>Intrinsic Goal Regulation</b>         | <b>1</b> | <b>1</b> | <b>2.0949</b>  | <b>0.8848</b>  | <b>5.6052</b>   | <b>0.0179</b> |
| Intrinsic Goal Regulation                | 2        | 1        | 0.1722         | 0.6797         | 0.0642          | 0.7999        |
| <b>Extrinsic Goal Regulation</b>         | <b>1</b> | <b>1</b> | <b>1.9619</b>  | <b>0.6419</b>  | <b>9.3413</b>   | <b>0.0022</b> |
| Extrinsic Goal Regulation                | 2        | 1        | 0.7311         | 0.4672         | 2.4493          | 0.1176        |
| <b>Task Value</b>                        | <b>1</b> | <b>1</b> | <b>-1.7916</b> | <b>0.9084</b>  | <b>3.8903</b>   | <b>0.0486</b> |
| Task Value                               | 2        | 1        | -0.7007        | 0.6731         | 1.0840          | 0.2978        |
| Control Beliefs                          | 1        | 1        | -0.7868        | 0.6290         | 1.5649          | 0.2109        |
| Control Beliefs                          | 2        | 1        | -0.2264        | 0.5815         | 0.1515          | 0.6971        |
| Self-Efficacy                            | 1        | 1        | -0.6091        | 0.6432         | 0.8968          | 0.3436        |
| Self-Efficacy                            | 2        | 1        | -0.5878        | 0.6453         | 0.8297          | 0.3624        |
| Test Anxiety                             | 1        | 1        | -0.7357        | 0.4285         | 2.9483          | 0.0860        |
| Test Anxiety                             | 2        | 1        | -0.2592        | 0.3094         | 0.7015          | 0.4023        |
| Rehearsal                                | 1        | 1        | -0.3590        | 0.5238         | 0.4697          | 0.4931        |
| Rehearsal                                | 2        | 1        | 0.2311         | 0.4519         | 0.2615          | 0.6091        |
| Elaboration                              | 1        | 1        | -0.2681        | 0.6842         | 0.1535          | 0.6952        |
| Elaboration                              | 2        | 1        | -0.1583        | 0.5965         | 0.0704          | 0.7907        |
| Organization                             | 1        | 1        | 0.4196         | 0.5039         | 0.6932          | 0.4051        |
| Organization                             | 2        | 1        | 0.2512         | 0.4508         | 0.3106          | 0.5773        |
| Critical Thinking                        | 1        | 1        | -0.8925        | 0.5056         | 3.1158          | 0.0775        |
| Critical Thinking                        | 2        | 1        | 0.1975         | 0.4806         | 0.1689          | 0.6811        |

## Analysis of Maximum Likelihood Estimates

| Parameter                           | Combined | DF       | Estimate       | Standard Error | Wald Chi-Square | Pr > ChiSq    |
|-------------------------------------|----------|----------|----------------|----------------|-----------------|---------------|
| <b>Metacognition</b>                | <b>1</b> | <b>1</b> | <b>2.0104</b>  | <b>0.9218</b>  | <b>4.7563</b>   | <b>0.0292</b> |
| Metacognition                       | 2        | 1        | 1.4185         | 0.8237         | 2.9658          | 0.0850        |
| <b>Time and Study Environment</b>   | <b>1</b> | <b>1</b> | <b>1.8435</b>  | <b>0.8066</b>  | <b>5.2237</b>   | <b>0.0223</b> |
| Time and Study Environment          | 2        | 1        | 0.3110         | 0.5928         | 0.2751          | 0.5999        |
| <b>Effort Regulation</b>            | <b>1</b> | <b>1</b> | <b>-1.6121</b> | <b>0.7494</b>  | <b>4.6277</b>   | <b>0.0315</b> |
| Effort Regulation                   | 2        | 1        | -0.3221        | 0.6004         | 0.2879          | 0.5916        |
| Peer Learning                       | 1        | 1        | 0.8779         | 0.4827         | 3.3074          | 0.0690        |
| Peer Learning                       | 2        | 1        | 0.0680         | 0.4089         | 0.0276          | 0.8680        |
| <b>Help Seeking</b>                 | <b>1</b> | <b>1</b> | <b>-1.2710</b> | <b>0.5751</b>  | <b>4.8842</b>   | <b>0.0271</b> |
| Help Seeking                        | 2        | 1        | -0.5057        | 0.4506         | 1.2597          | 0.2617        |
| Science Identity                    | 1        | 1        | -1.1288        | 0.8721         | 1.6753          | 0.1955        |
| Science Identity                    | 2        | 1        | -1.2858        | 0.7374         | 3.0406          | 0.0812        |
| <b>Gender_Male</b>                  | <b>1</b> | <b>1</b> | <b>6.3248</b>  | <b>1.7738</b>  | <b>12.7137</b>  | <b>0.0004</b> |
| <b>Gender_Male</b>                  | <b>2</b> | <b>1</b> | <b>4.5949</b>  | <b>1.4542</b>  | <b>9.9838</b>   | <b>0.0016</b> |
| <b>Race_White/European American</b> | <b>1</b> | <b>1</b> | <b>3.4846</b>  | <b>1.2588</b>  | <b>7.6633</b>   | <b>0.0056</b> |
| <b>Race_White/European American</b> | <b>2</b> | <b>1</b> | <b>2.9683</b>  | <b>1.0988</b>  | <b>7.2975</b>   | <b>0.0069</b> |
| Race_Hispanic/Latin American        | 1        | 1        | 2.4080         | 1.4406         | 2.7939          | 0.0946        |
| Race_Hispanic/Latin American        | 2        | 1        | 1.2998         | 1.2745         | 1.0402          | 0.3078        |
| Hypothesis Revision                 | 1        | 1        | -1.2045        | 1.2499         | 0.9286          | 0.3352        |
| Hypothesis Revision                 | 2        | 1        | 0.9910         | 1.2746         | 0.6045          | 0.4369        |
| <b>Non-science Major</b>            | <b>1</b> | <b>1</b> | <b>-4.7288</b> | <b>2.0794</b>  | <b>5.1714</b>   | <b>0.0230</b> |
| <b>Non-science Major</b>            | <b>2</b> | <b>1</b> | <b>-1.2973</b> | <b>1.9815</b>  | <b>0.4286</b>   | <b>0.5127</b> |
| <b>Biology Major</b>                | <b>1</b> | <b>1</b> | <b>-1.2306</b> | <b>1.6801</b>  | <b>0.5365</b>   | <b>0.4639</b> |

## Analysis of Maximum Likelihood Estimates

| Parameter            | Combined | DF | Estimate | Standard Error | Wald Chi-Square | Pr > ChiSq |
|----------------------|----------|----|----------|----------------|-----------------|------------|
| <b>Biology Major</b> | 2        | 1  | -0.0666  | 1.9811         | 0.0011          | 0.9732     |
